# Supplementary material
Source: PubMed Central journal article supplement (PMC6563931)
Supplement: NIHMS1020645-supplement-Table_1.pdf [file NIHMS1020645-supplement-Table_1.pdf]

Table 1 | Water quality descriptive statistics for home and source samples (home, n = 59; source, n = 27)

|                           | Source samples (log number of gene copies/100 ml) |        |       | Home samples (log number of gene copies/100 ml) |        |        |
|---------------------------|---------------------------------------------------|--------|-------|-------------------------------------------------|--------|--------|
|                           | Mean <sup>a</sup>                                 | Median | Range | Mean <sup>a</sup>                               | Median | Range  |
| <i>Campylobacter</i> spp. | 0.98                                              | 0.01   | 0–4.4 | 0.99                                            | 1.02   | 0–1.02 |
| <i>Salmonella</i> spp.    | 1.26                                              | 1.26   | 0–1.3 | 2.92                                            | 2.50   | 0–3.46 |
| <i>S. aureus</i>          | 3.47                                              | 3.47   | 0–3.7 | 4.78                                            | 3.96   | 0–5.49 |
| <i>stx1</i>               | n.d. <sup>b</sup>                                 | n.d.   | n.d.  | 4.12                                            | 4.06   | 0–4.67 |
| <i>stx2</i>               | n.d.                                              | n.d.   | n.d.  | 3.55                                            | 1.30   | 0–4.15 |
| HF183                     | 8.0                                               | 8.00   | 0–8.3 | 6.26                                            | 5.97   | 0–6.73 |
| Rum2Bac                   | 4.66                                              | 4.62   | 0–5.1 | 5.46                                            | 4.87   | 0–6.36 |
| GFD                       | 4.37                                              | 4.37   | 0–4.4 | 0.70                                            | 0.70   | 0–0.70 |
| <i>tetQ</i>               | 3.80                                              | 3.32   | 0–4.5 | 3.59                                            | 3.31   | 0–4.30 |

<sup>a</sup>All means reported are arithmetic.

<sup>b</sup>n.d. = none detected.
